# Supplementary material for: Insights from in silico study of receptor energetics of SARS-CoV-2 variants
Source: Royal Society of Chemistry journal article supplement (doi:10.1039/d3cp04997c), 2024-01-01
Supplement: d3cp04997c1.pdf [file d3cp04997c1.pdf]

## Supplementary Data

### Insights from In Silico Study of Receptor Energetics of SARS-CoV-2 Variants

Lokendra Singh Dhama, Prabin Dahal, Bidhya Thapa, Narayan Gautam,  
Nurapati Pantha, Rameshwar Adhikari, and Narayan Prasad Adhikari\*

**Table S1:** Mutations in the receptor binding domain (RBD) of Beta, Delta, Kappa, and Delta Plus variants.

| Variants   | Mutations                                               |
|------------|---------------------------------------------------------|
| Beta       | LYS417 → ASN417,<br>GLU484 → LYS484,<br>ASN501 → TYR501 |
| Delta      | LEU452 → ARG452,<br>THR478 → LYS478                     |
| Kappa      | LEU452 → ARG452,<br>GLU484 → GLN484                     |
| Delta Plus | LYS417 → ASN417,<br>THR478 → LYS478,<br>LEU452 → ARG452 |

**Table S2:** Mutations in the receptor binding domain (RBD) the Omicron variant.

| Variants | Mutations                                                                                                                                                                                                                                                                                               |
|----------|---------------------------------------------------------------------------------------------------------------------------------------------------------------------------------------------------------------------------------------------------------------------------------------------------------|
| Omicron  | LYS417 → ASN417,<br>GLY446 → SER446,<br>GLU484 → ALA484,<br>GLN493 → ARG493,<br>GLY496 → SER496,<br>GLN498 → ARG498,<br>ASN501 → TYR501,<br>TYR505 → HSD505,<br>SER477 → ASN477,<br>GLY339 → ASP339,<br>SER371 → LEU371,<br>SER373 → PRO373,<br>SER375 → PHE375,<br>ASN440 → LYS440,<br>THR478 → LYS478 |

**Table S3:** Details of system preparation of SARS-CoV-2 variants for harmonically restrained MD simulation in umbrella sampling.

| Variants   | System Size ( $\text{\AA}^3$ ) | Ions Added<br>(0.15 M Conc. )           | Total Atoms |
|------------|--------------------------------|-----------------------------------------|-------------|
| Beta       | $250 \times 90 \times 90$      | 192 $\text{Na}^+$ and 168 $\text{Cl}^-$ | 189,275     |
| Delta      | $250 \times 90 \times 90$      | 191 $\text{Na}^+$ and 168 $\text{Cl}^-$ | 189,254     |
| Omicron    | $250 \times 90 \times 90$      | 190 $\text{Na}^+$ and 168 $\text{Cl}^-$ | 189,368     |
| Kappa      | $250 \times 90 \times 90$      | 191 $\text{Na}^+$ and 167 $\text{Cl}^-$ | 188,882     |
| Delta Plus | $250 \times 90 \times 90$      | 192 $\text{Na}^+$ and 168 $\text{Cl}^-$ | 189,391     |

**Table S4:** Details of system preparation of SARS-CoV-2 variants for unrestrained MD simulation.

| Variants   | System Size ( $\text{\AA}^3$ ) | Ions Added<br>(0.15 M Conc.)            | Total Atoms |
|------------|--------------------------------|-----------------------------------------|-------------|
| Beta       | $133 \times 133 \times 133$    | 219 $\text{Na}^+$ and 197 $\text{Cl}^-$ | 222,749     |
| Delta      | $133 \times 133 \times 133$    | 222 $\text{Na}^+$ and 119 $\text{Cl}^-$ | 222,758     |
| Omicron    | $133 \times 133 \times 133$    | 224 $\text{Na}^+$ and 202 $\text{Cl}^-$ | 227,029     |
| Kappa      | $137 \times 137 \times 137$    | 241 $\text{Na}^+$ and 217 $\text{Cl}^-$ | 242,409     |
| Delta Plus | $133 \times 133 \times 133$    | 221 $\text{Na}^+$ and 197 $\text{Cl}^-$ | 222,719     |

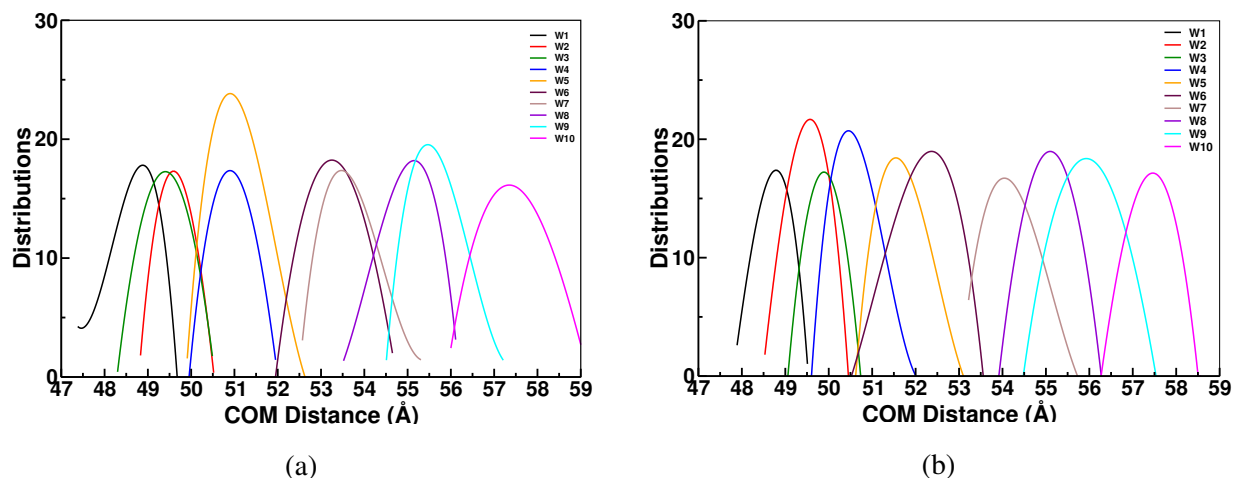

**Figure S1:** Distribution versus COM distance in (a) Delta (b) Delta Plus to ensure the overlapping of umbrella windows.

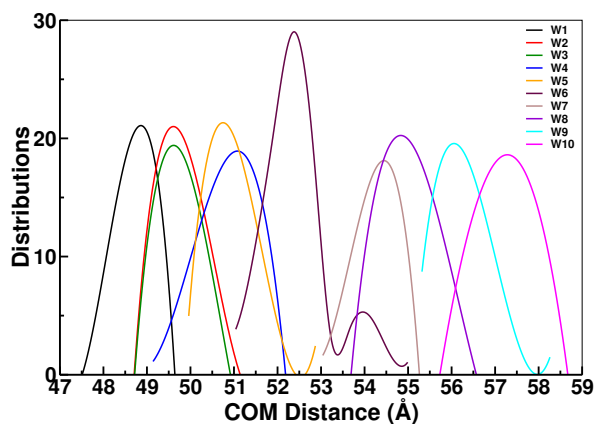

(a)

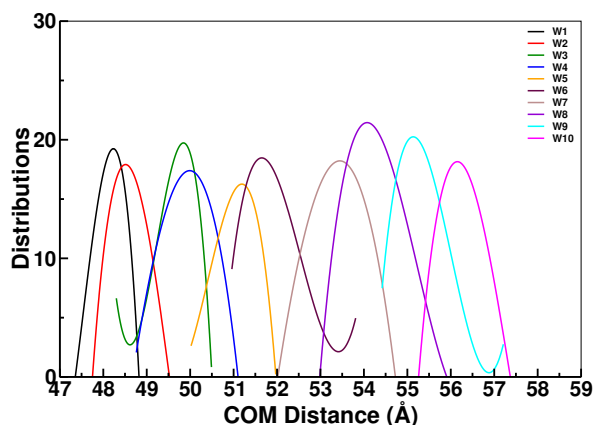

(b)

**Figure S2:** Distribution versus COM distance in (a) Beta (b) Kappa to ensure the overlapping of umbrella windows.

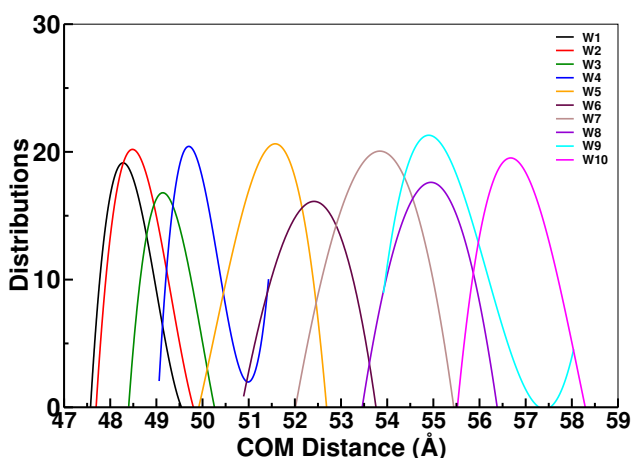

**Figure S3:** Distribution versus COM distance in Omicron to ensure the overlapping of umbrella windows.

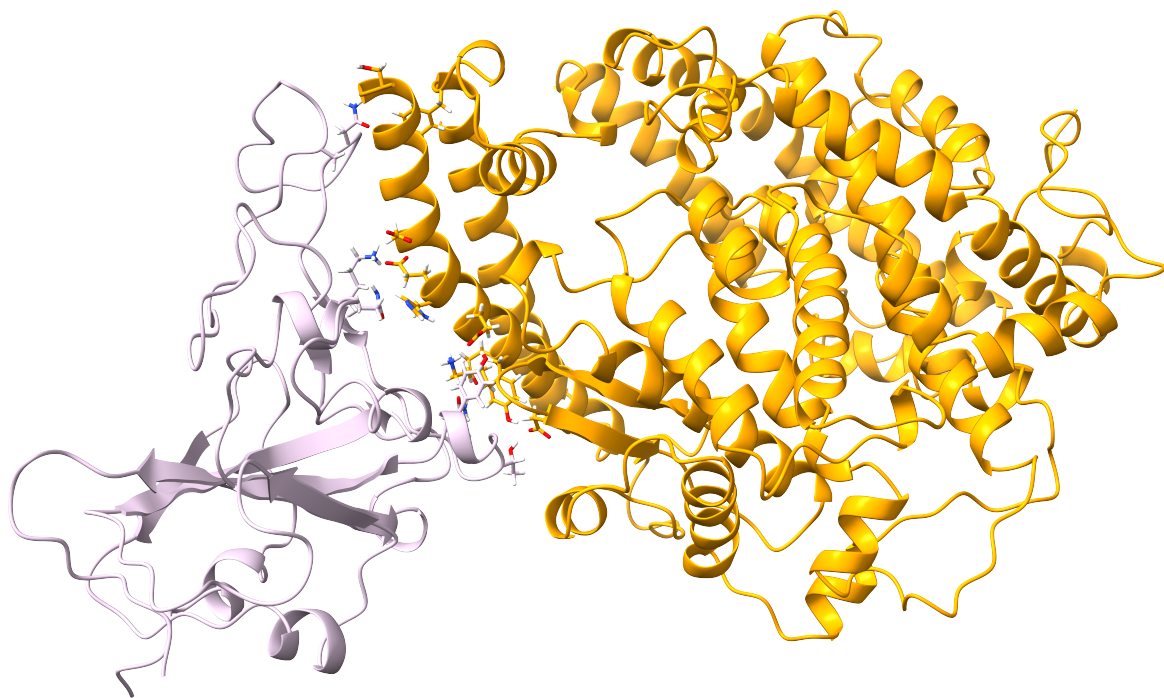

(a)

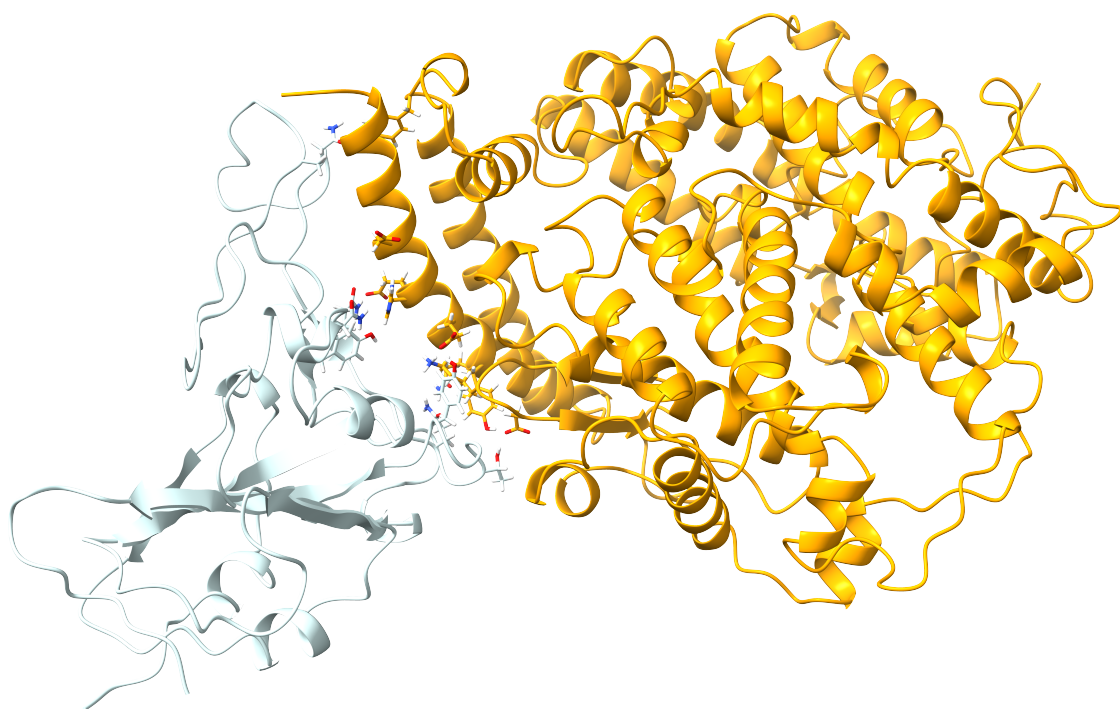

(b)



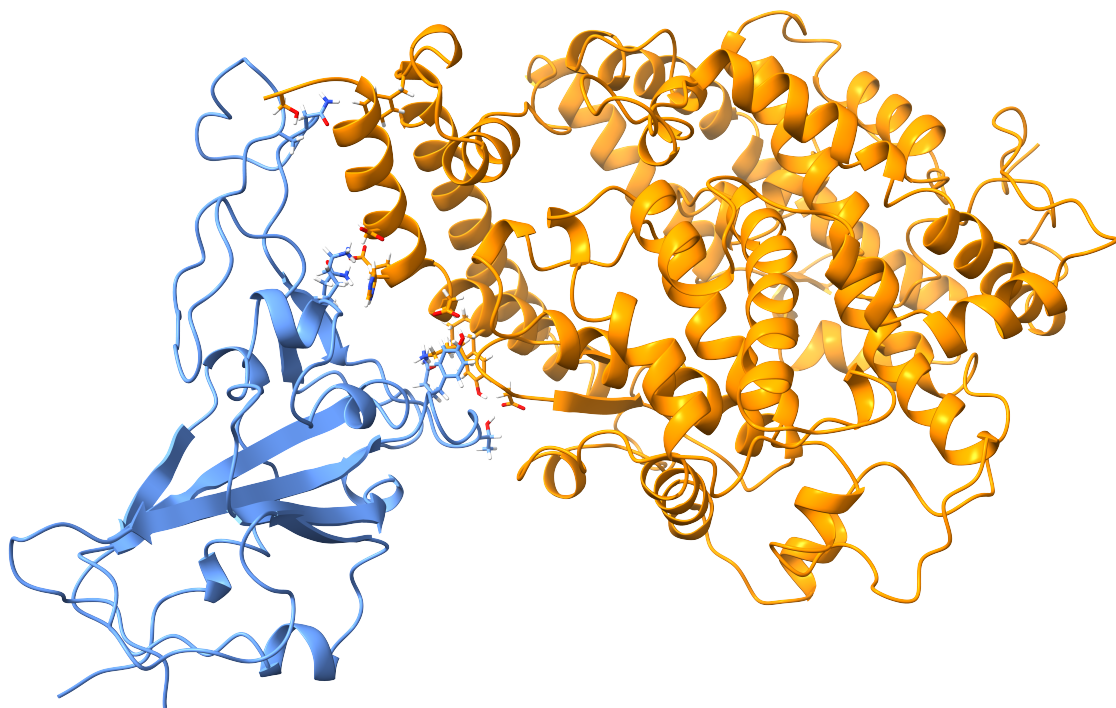

(c)

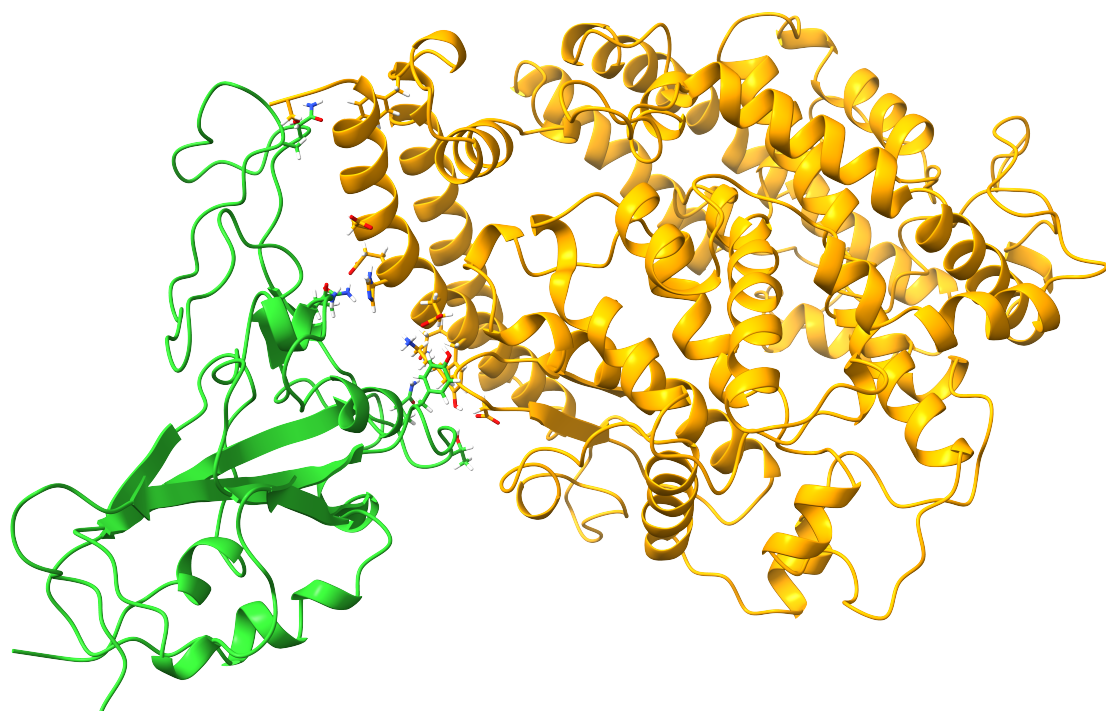

(d)

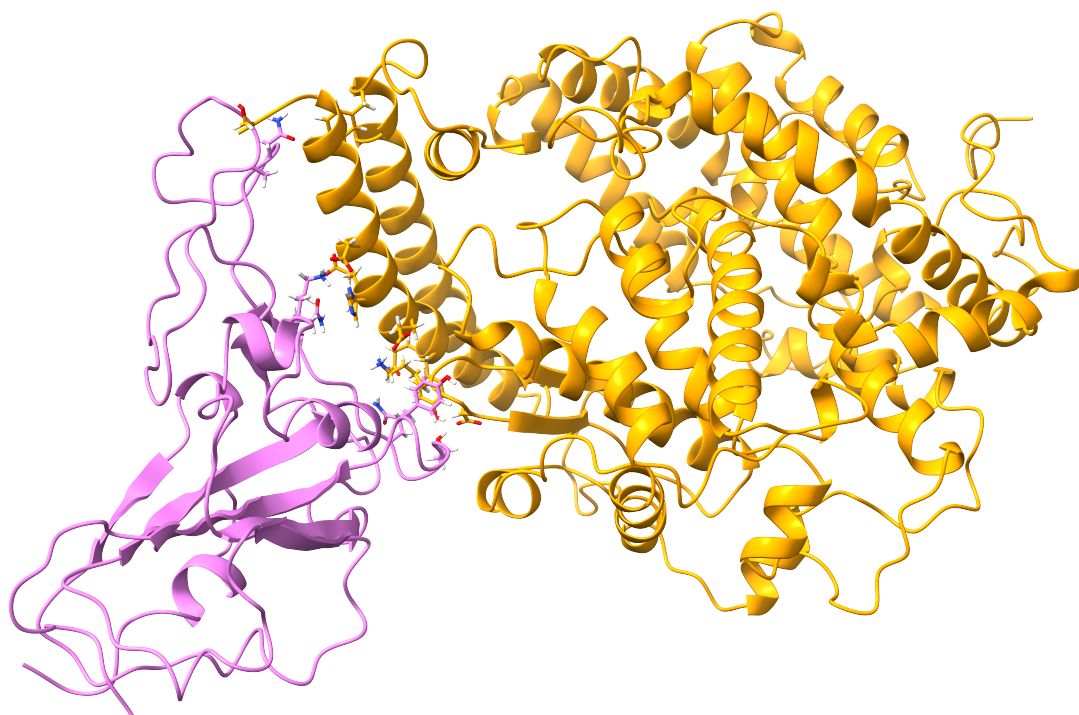

(e)

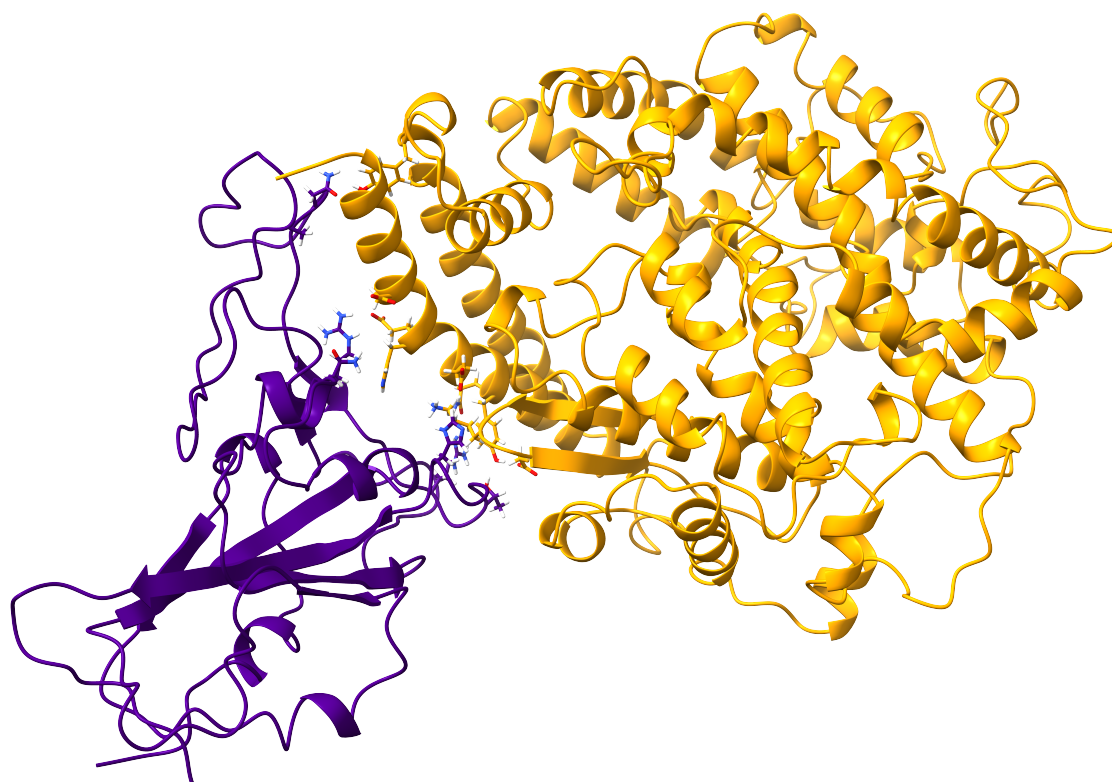

(f)

**Figure S4:** Structural images of the protein-protein complexes, including key residues, in their most stable minima obtained from umbrella sampling simulations (a) Delta, (b) Delta Plus, (c) Wild-type, (d) Beta, (e) Kappa, and (f) Omicron.

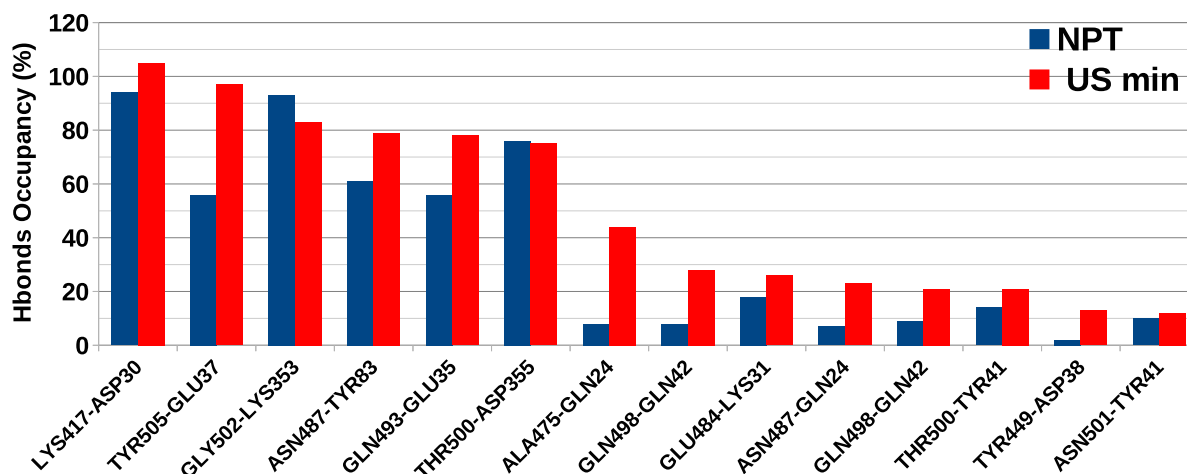

**Figure S5:** Comparison of occupancy of Hbonds of umbrella windows corresponding to free energy minimum (US min) and initial configuration (NPT) in the Delta variant.

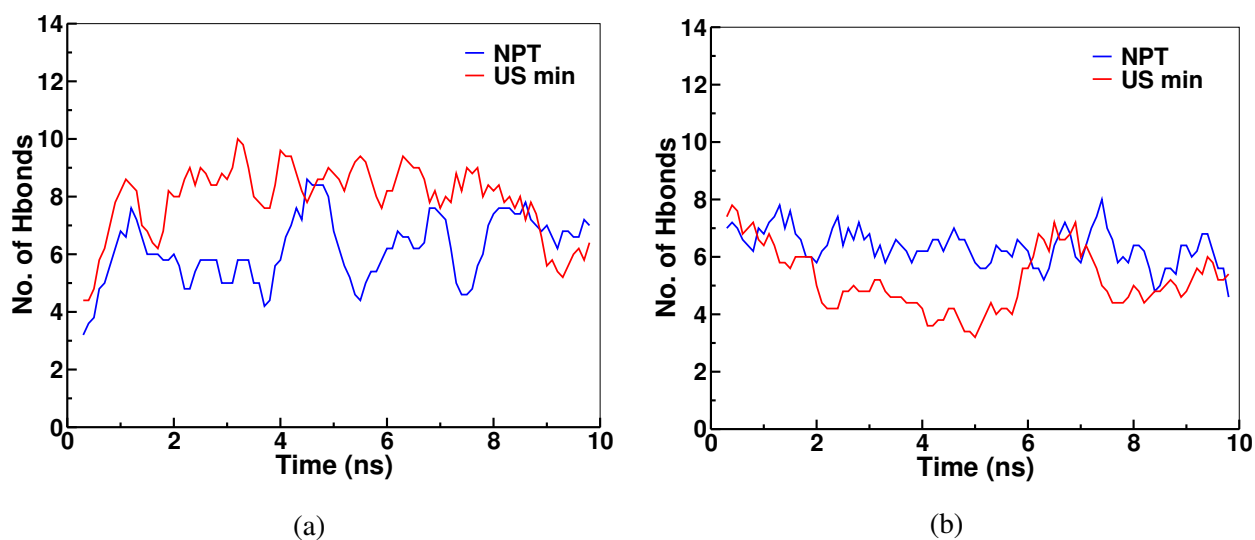

**Figure S6:** Comparison of time evolution of Hbonds of umbrella windows corresponding to free energy minimum (US min) and initial configuration (NPT) in (a) Delta (b) Delta Plus variants.

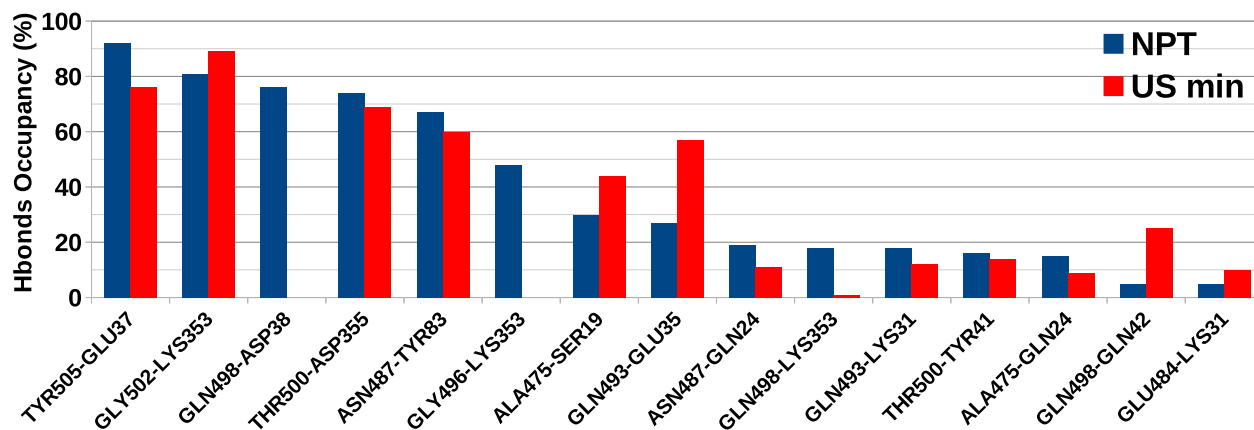

**Figure S7:** Comparison of occupancy of Hbonds of umbrella windows corresponding to free energy minimum (US min) and initial configuration (NPT) in the Delta Plus variant..

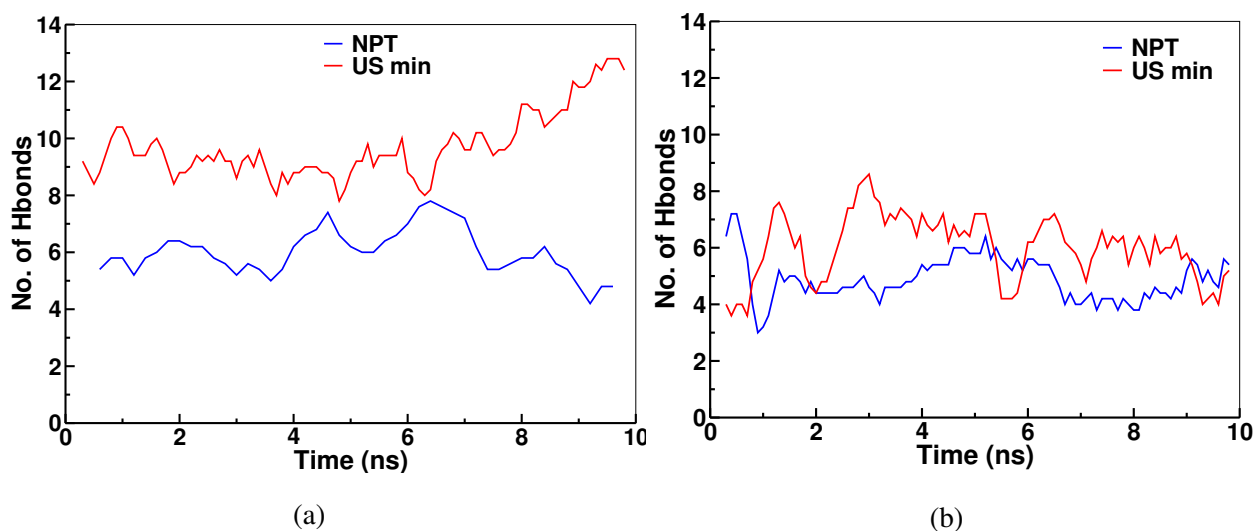

**Figure S8:** Comparison of time evolution of Hbonds of umbrella windows corresponding to free energy minimum (US min) and initial configuration (NPT) in (a) WT (b) Beta variants.

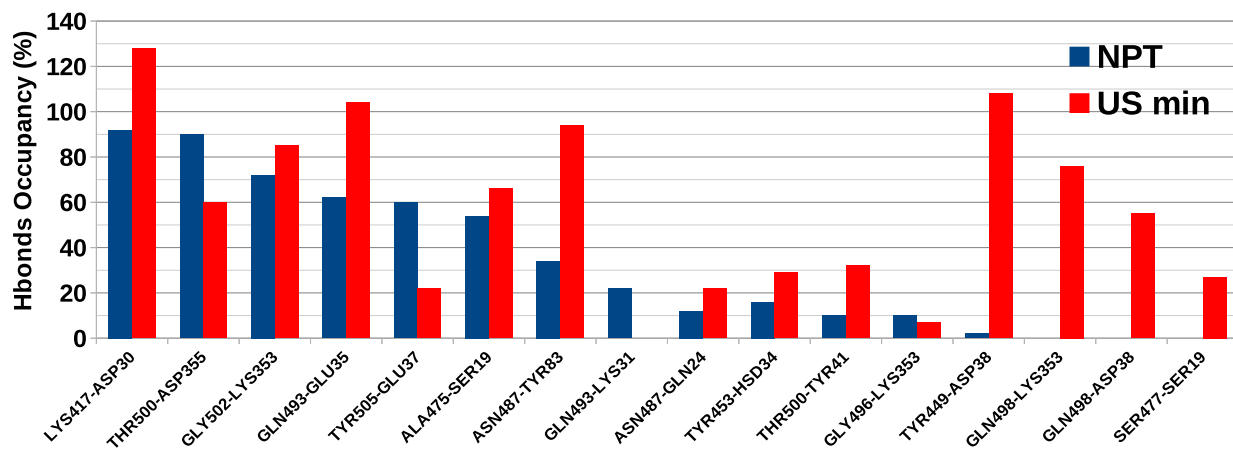

**Figure S9:** Comparison of occupancy of Hbonds of umbrella windows corresponding to free energy minimum (US min) and initial configuration (NPT) in the WT.

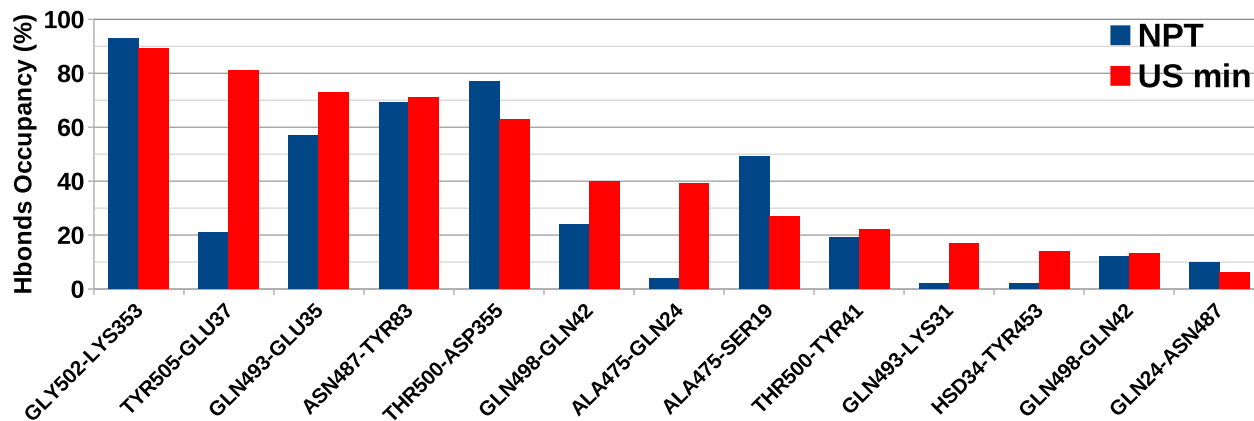

**Figure S10:** Comparison of occupancy of Hbonds of umbrella windows corresponding to free energy minimum (US min) and initial configuration (NPT) in the Beta variant.

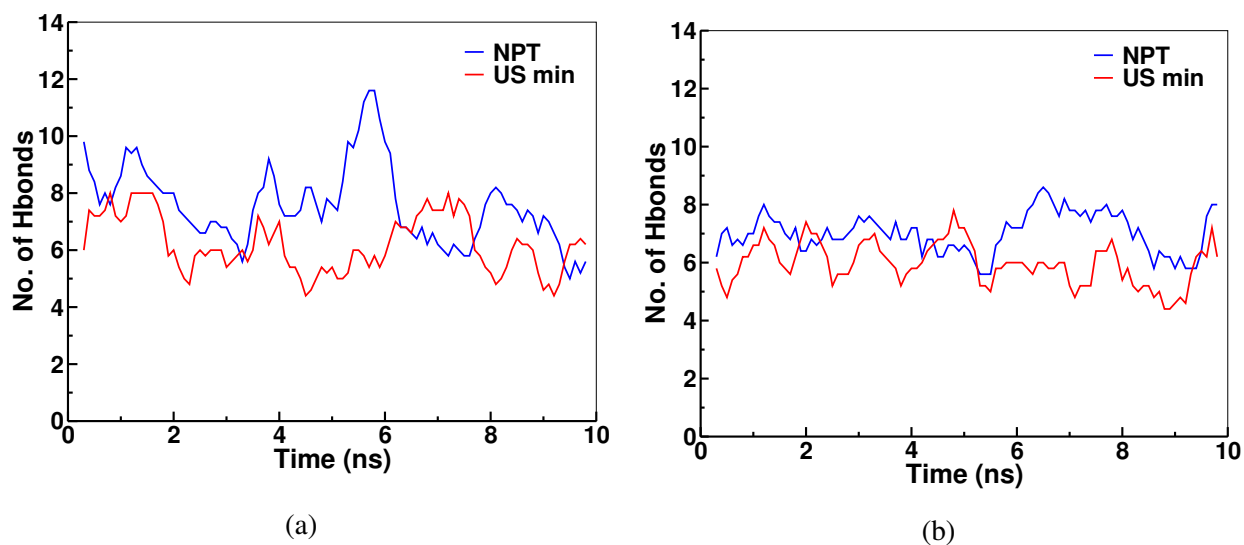

**Figure S11:** Comparison of time evolution of Hbonds of umbrella windows corresponding to free energy minimum (US min) and initial configuration (NPT) in (a) Kappa (b) Omicron variants.

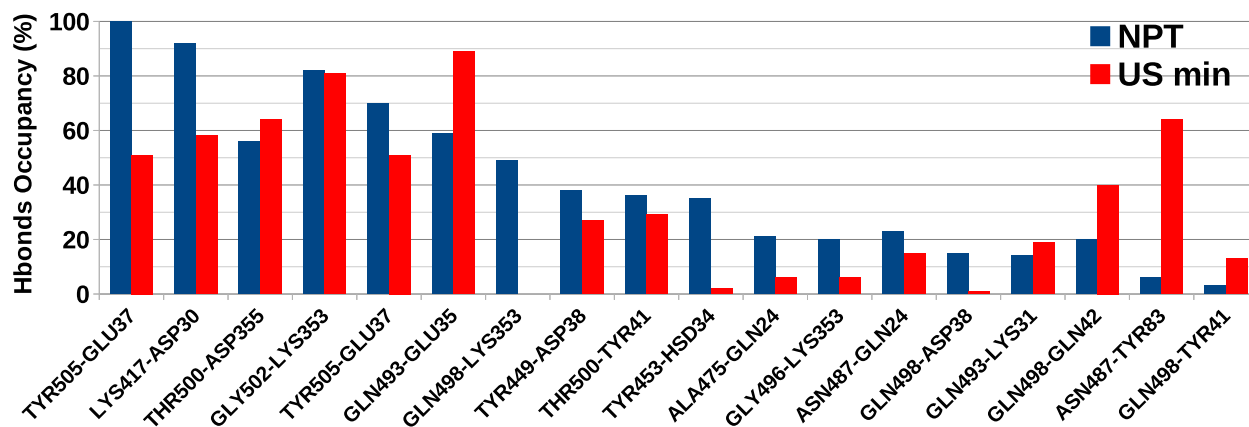

**Figure S12:** Comparison of occupancy of Hbonds of umbrella windows corresponding to free energy minimum (US min) and initial configuration (NPT) in the Kappa variant.

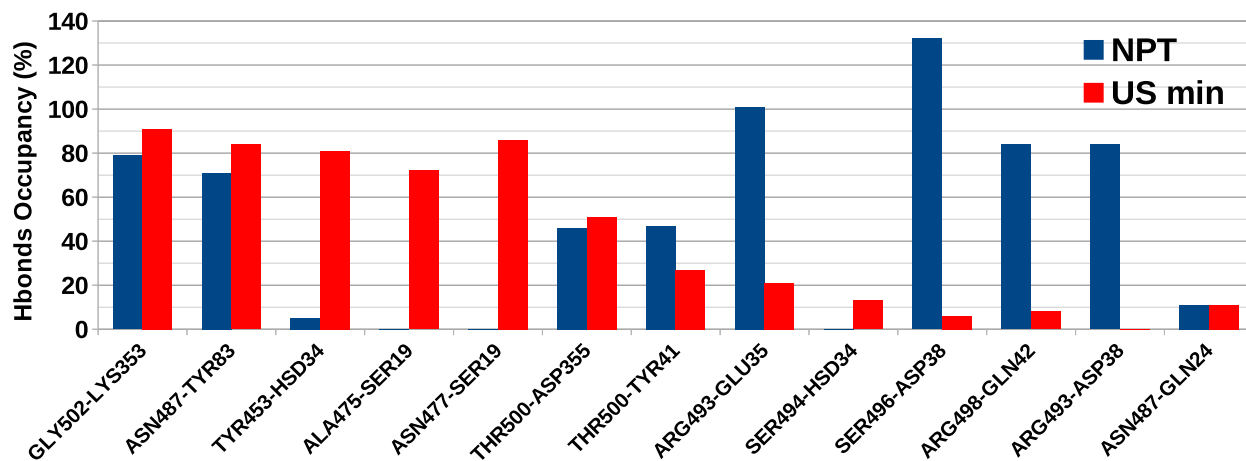

**Figure S13:** Comparison of occupancy of Hbonds of umbrella windows corresponding to free energy minimum (US min) and initial configuration (NPT) in the Omicron variant.

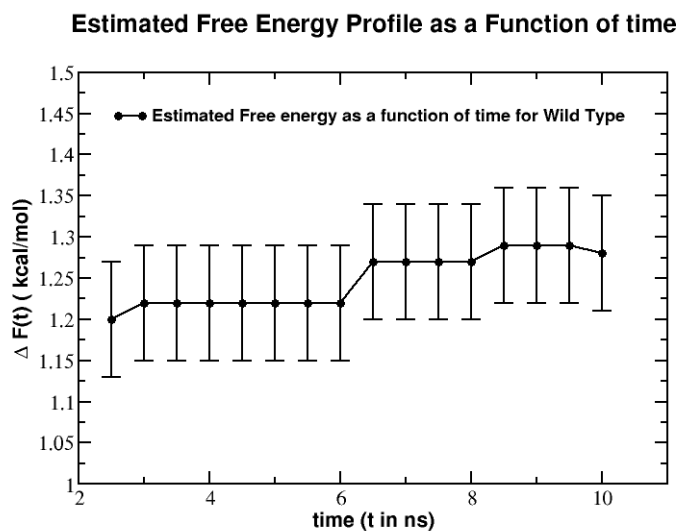

**Figure S14:** Time evolution of free energy obtained from the umbrella windows corresponding to the lowest free energy in the Wild-type.
